# Supplementary material
Source: PubMed Central journal article supplement (PMC2689686)

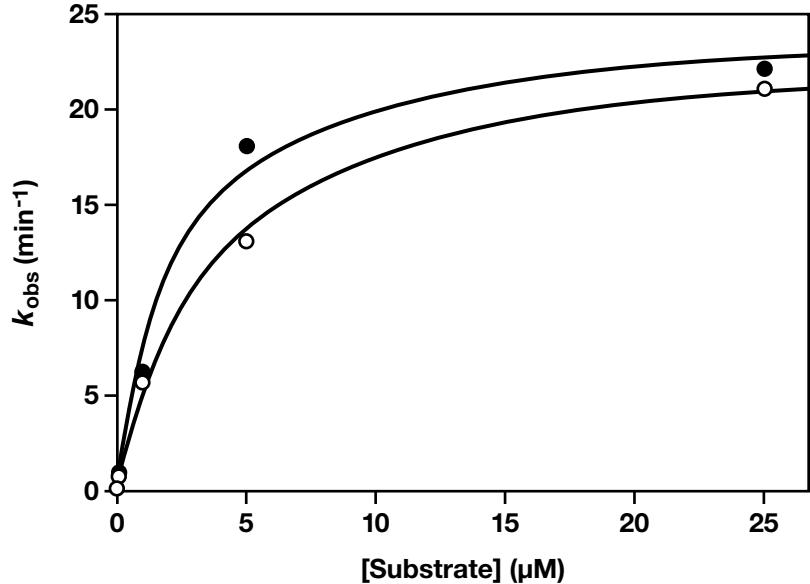

Supplement: pbio.0060085.sg001.pdf [file pbio.0060085.sg001.pdf]

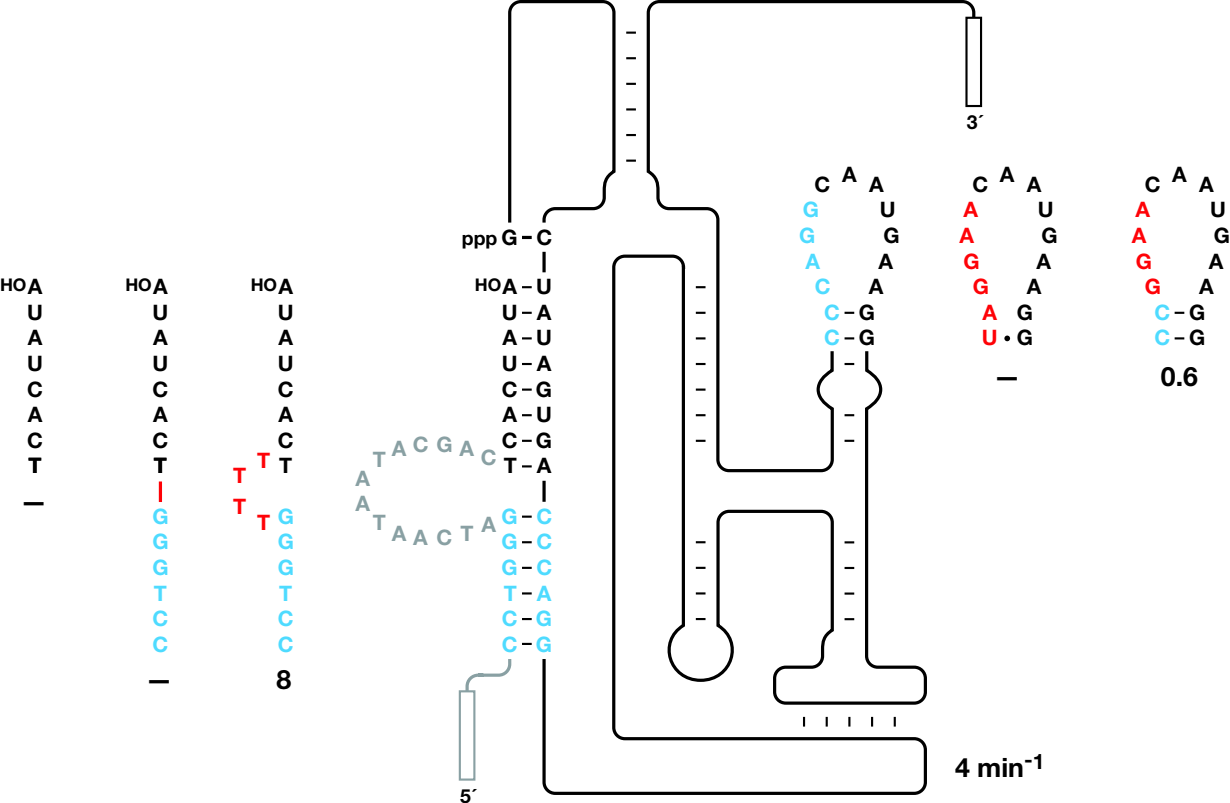

|     |     |     |
|-----|-----|-----|
| A C | A-U | G·U |
| T C | T-A | G A |
| C C | C-G | G G |
| C A | C-G | T·G |
| T·G | T-A | C A |
| T·G | T-A | C A |

— 0.1 —

|     |     |     |
|-----|-----|-----|
| G-C | G-C | G-C |
| G-C | G-C | G-C |
| C C | C-G | G G |
| C A | C-G | T·G |
| T·G | T-A | C A |
| T·G | T-A | C A |

— 0.6 0.3

Supplement: pbio.0060085.sg002.pdf [file pbio.0060085.sg002.pdf]
